# Supplementary material for: Development of a facile and sensitive fluorimetric derivatization reagent for detecting formaldehyde
Source: Royal Society of Chemistry journal article supplement (doi:10.1039/c6ay00108d), 2016-01-01
Supplement: c6ay00108d1.pdf [file c6ay00108d1.pdf]

## Electronic Supplementary data

For

### Development of a facile and sensitive fluorimetric derivatization reagent for detecting formaldehyde

Chao Liu,<sup>a,b</sup> An-Wei Cheng,<sup>a,b</sup> Xue-Kui Xia,<sup>c</sup> Yu-Fa Liu,<sup>d</sup> Sheng-Wen He,<sup>e</sup> Xu Guo<sup>a,b</sup> and Jin-Yue Sun<sup>\*a,b</sup>

<sup>a</sup>Institute of Agro-Food Science and Technology, Shandong Academy of Agricultural Sciences, 202 Gongye North Road, Jinan 250100, PR China;

<sup>b</sup>Key Laboratory of Agro-Products Processing Technology of Shandong Province, Jinan 250100, PR China;

<sup>c</sup>Biology Institute of Shandong Academy of Sciences, NO. 19 Ke Yuan Road, Jinan 250014, PR China;

<sup>d</sup>College of Chemistry, Chemical Engineering and Materials Science, Engineering Research Center of Pesticide and Medicine, Intermediate Clean Production, Ministry of Education, Shandong Normal University, Jinan 250014, P.R. China

<sup>e</sup>School of public health and management, Weifang Medical University, 7166 Baotong Road, Weifang, Shandong 261053, PR China;

\*Corresponding author, E-mail: moon\_s731@hotmail.com;

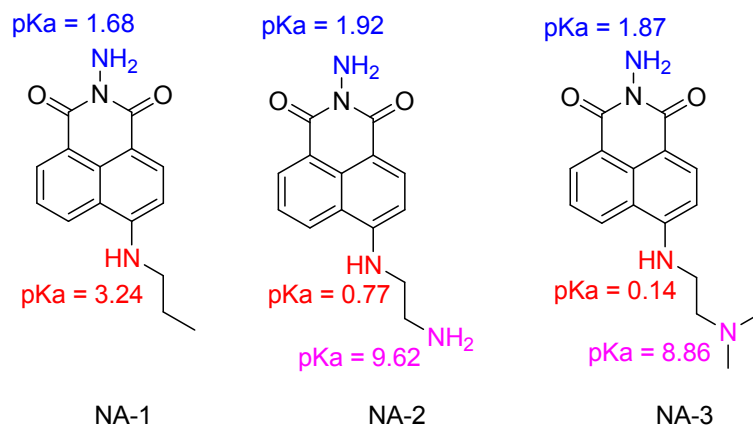

Fig. S1 *pKa* values of amino groups calculated by MarvinSketch software using macro mode and dynamic acid/baseprefix at 298 K

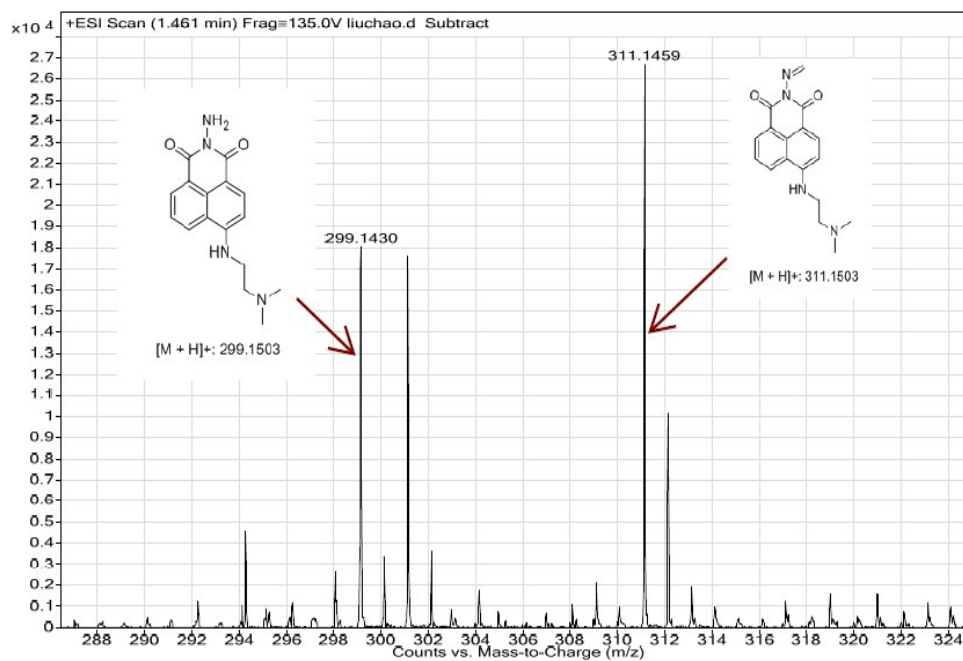

Fig. S2 HRMS spectrum of isolated reaction product of **NA3** and formaldehyde

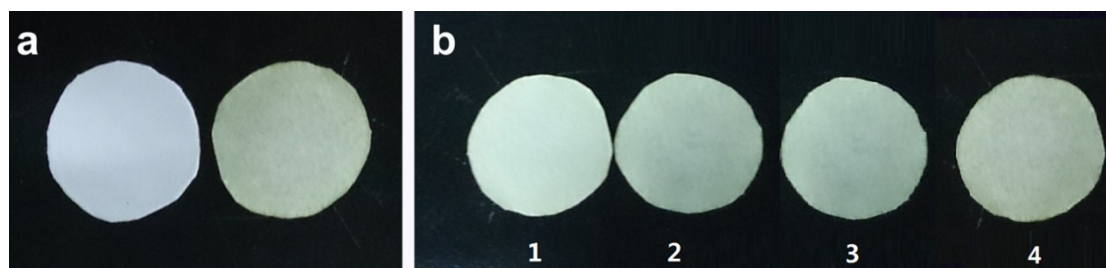

Fig. S3 (a) Photographs of the white filter paper (left) and prepared test paper (right) under natural light, (b) photographs of the test paper in the absence and presence of formaldehyde under natural light. 1, blank; 2, formaldehyde in MeCN (10 % HOAc) solution; 3, formaldehyde in water solution; 4, formaldehyde-contained air condition

Table S1. Detailed comparison of the reagent NA3 with other reported fluorimetric derivatization reagents

| reagent     | reaction site | $\lambda_{em}/nm$ | detection limit / $\mu M.L^{-1}$ | reaction time | comment                    | Ref.      |
|-------------|---------------|-------------------|----------------------------------|---------------|----------------------------|-----------|
| hydralazine | hydrazine     | 389               | 0.067                            | 25 min        | 100 °C                     | 1         |
| AAA         | carboxide     | 368               | 0.02                             | 10-30 min     | in the presence of ammonia | 2         |
| FAP-1       | amino         | 662               | 5.0                              | 2 h           | --                         | 3         |
| FP1         | amino         | 650               | 10.0                             | 3 h           | 37 °C                      | 4         |
| NPz         | hydrazine     | 540               | 8.72                             | 4 min         | room temperature           | 5         |
| RFFP        | amino         | 359, 451          | 18.7                             | > 3h          | --                         | 6         |
| NA3         | hydrazine     | 515               | 0.104                            | 9min          | room temperature           | this work |

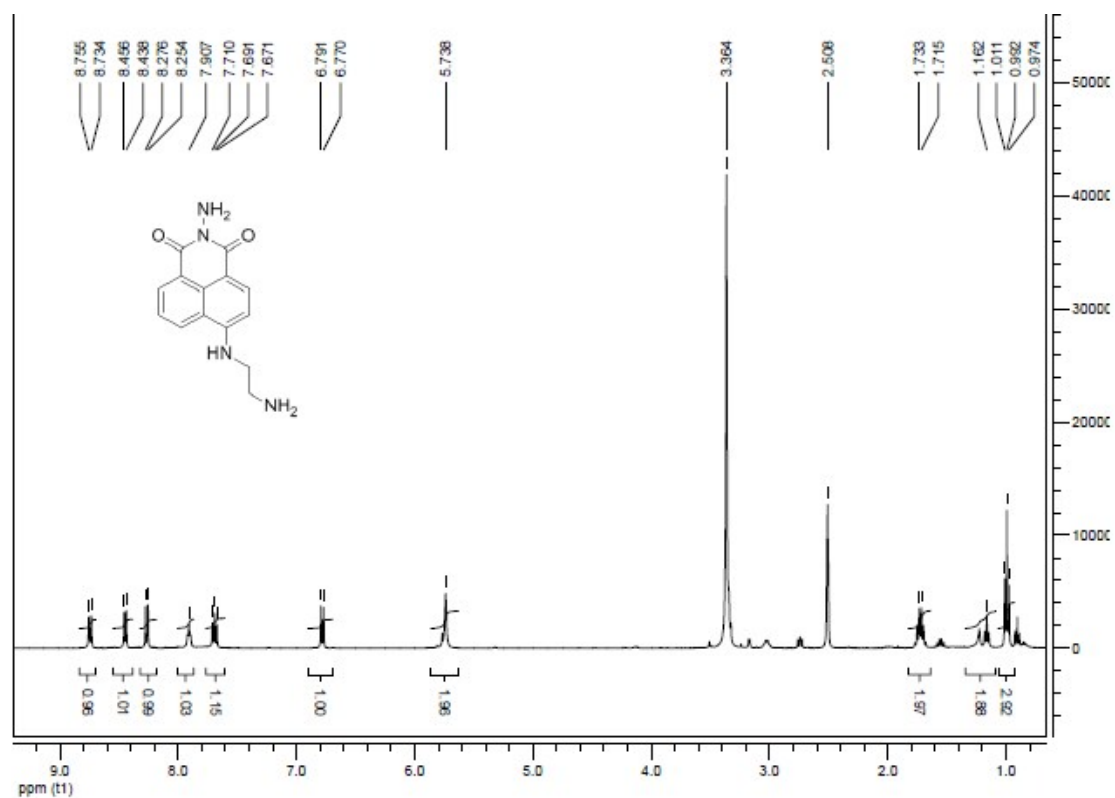

Fig. S4 <sup>1</sup>H-NMR spectrum of NA1

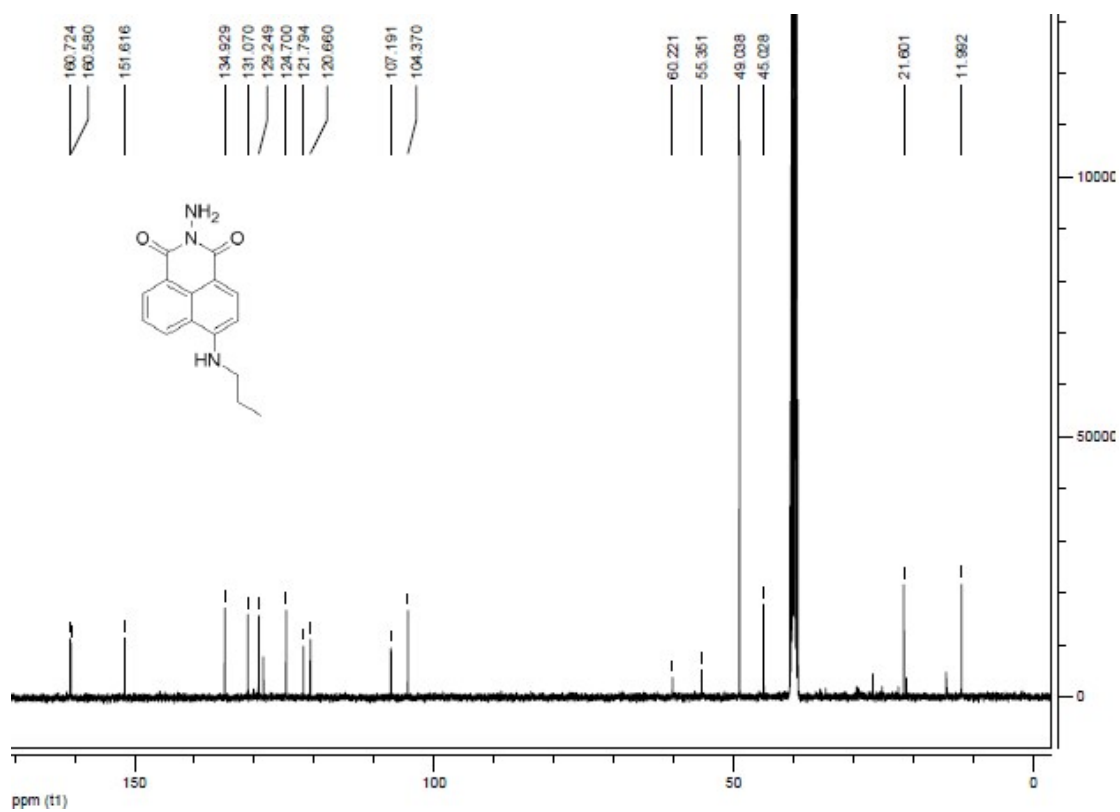

Fig. S5 <sup>13</sup>C-NMR spectrum of NA1

|               |              |             |             |                 |                                   |                        |             |
|---------------|--------------|-------------|-------------|-----------------|-----------------------------------|------------------------|-------------|
| Sample Name   | Unavailable  | Position    | Unavailable | Instrument Name | Unavailable                       | User Name              | Unavailable |
| Inj Vol       | Unavailable  | InjPosition | Unavailable | SampleType      | Unavailable                       | IRM Calibration Status | Success     |
| Data Filename | 0908-810-1.d | ACQ Method  |             | Comment         | Sample information is unavailable | Acquired Time          | Unavailable |

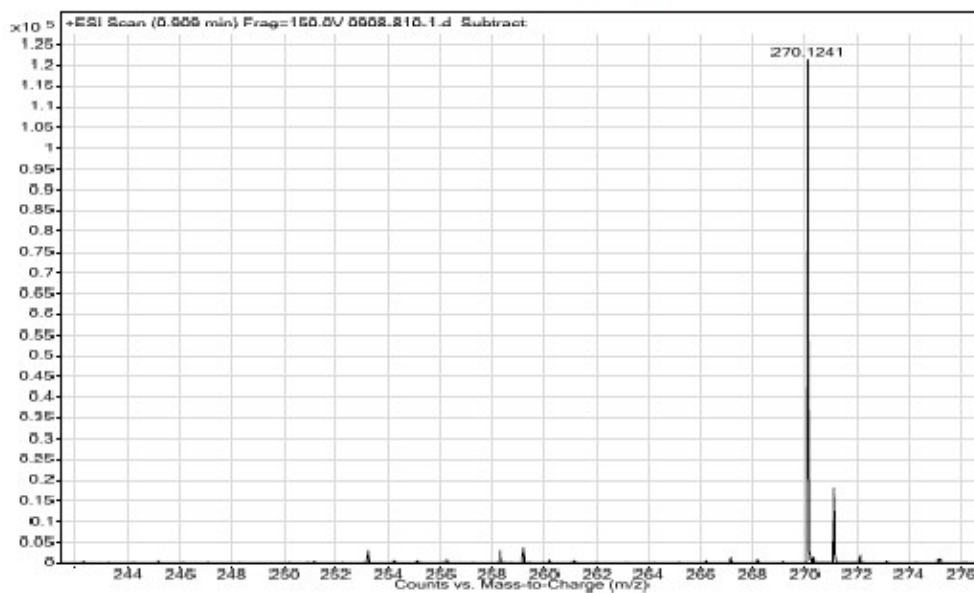

Fig. S6 HR-ESI-MS spectrum of NA1

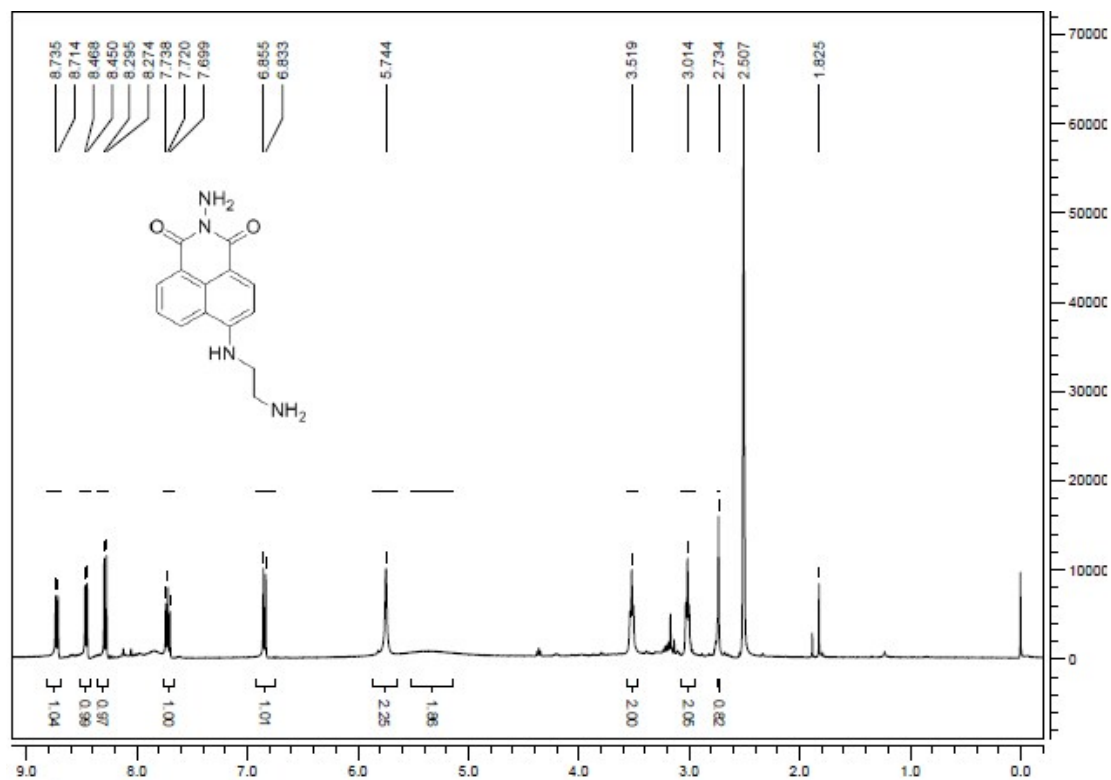

Fig. S7 <sup>1</sup>H-NMR spectrum of NA2

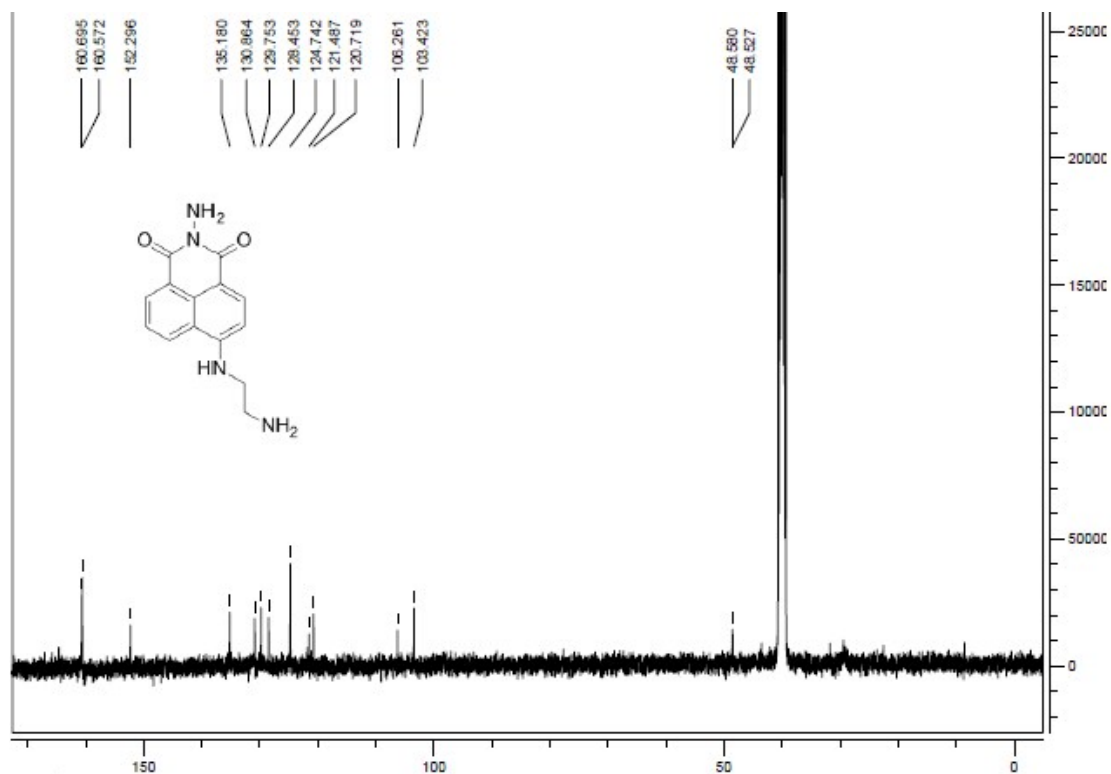

Fig. S8 <sup>13</sup>C-NMR spectrum of NA2

| Sample Name   | 0908-610     | Position    | F1-68  | Instrument Name | Instrument 1 | User Name              |                     |
|---------------|--------------|-------------|--------|-----------------|--------------|------------------------|---------------------|
| Inj Vol       | 1            | InjPosition |        | SampleType      | Sample       | IRM Calibration Status | Success             |
| Data Filename | 0908-727-1.d | ADQ Method  | 0103.m | Comment         |              | Acquired Time          | 9/8/2015 9:44:53 AM |

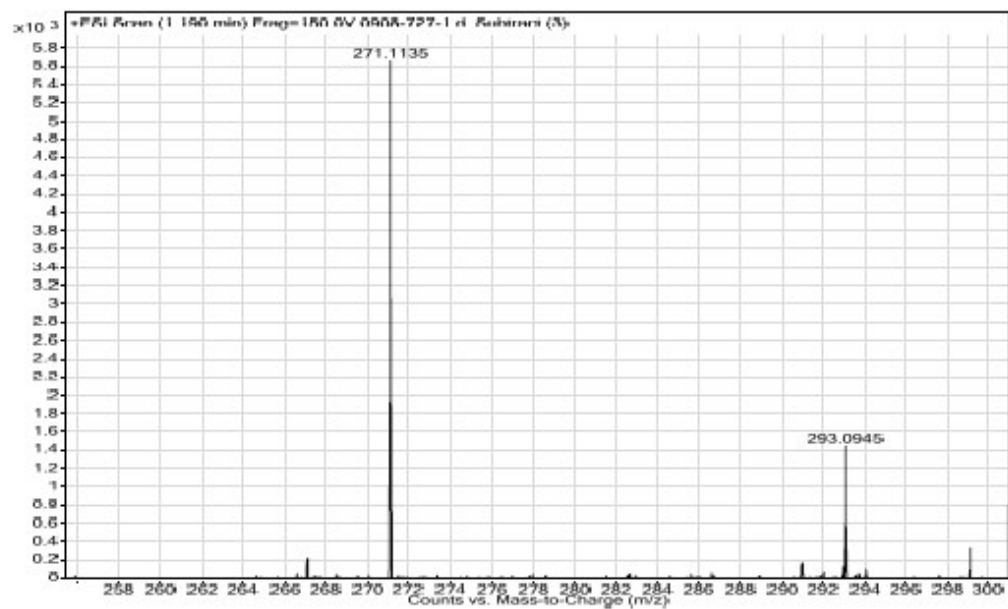

Fig. S9 HR-ESI-MS spectrum of NA2

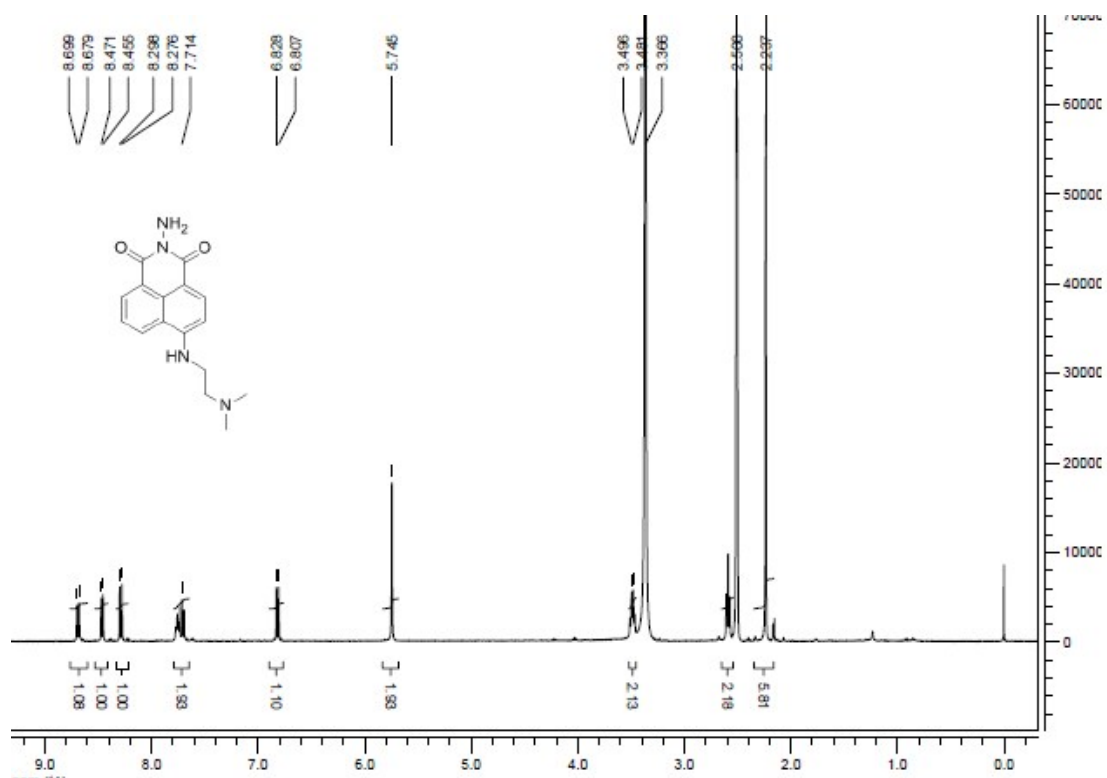

Fig. S10  $^1\text{H-NMR}$  spectrum of NA3

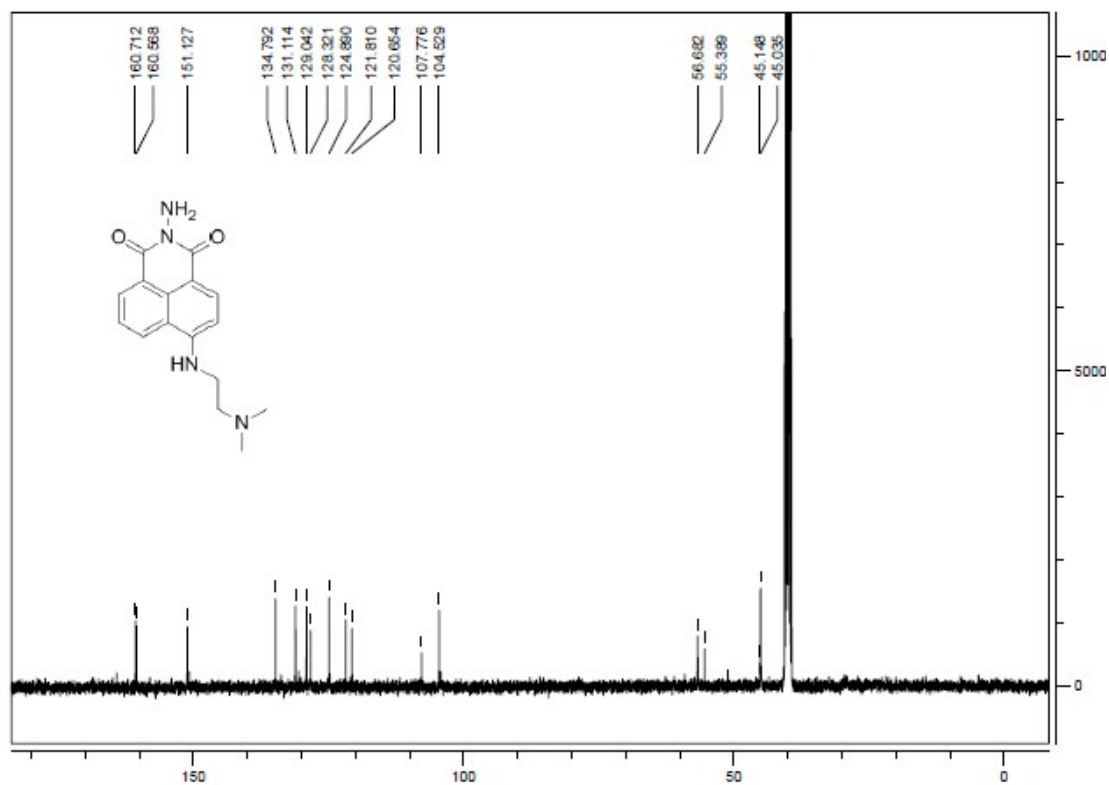

Fig. S11  $^{13}\text{C-NMR}$  spectrum of NA3

Sample Name 0908-808 Position P1-P8 Instrument Name Instrument 1 User Name  
 Inj Vol -1 InjPosition InjPosition SampleType Sample IRM Calibration Status Success  
 Data Filename 0908-808.d ACQ Method 0103.m Comment Acquired Time 9/8/2015 9:33:02 AM

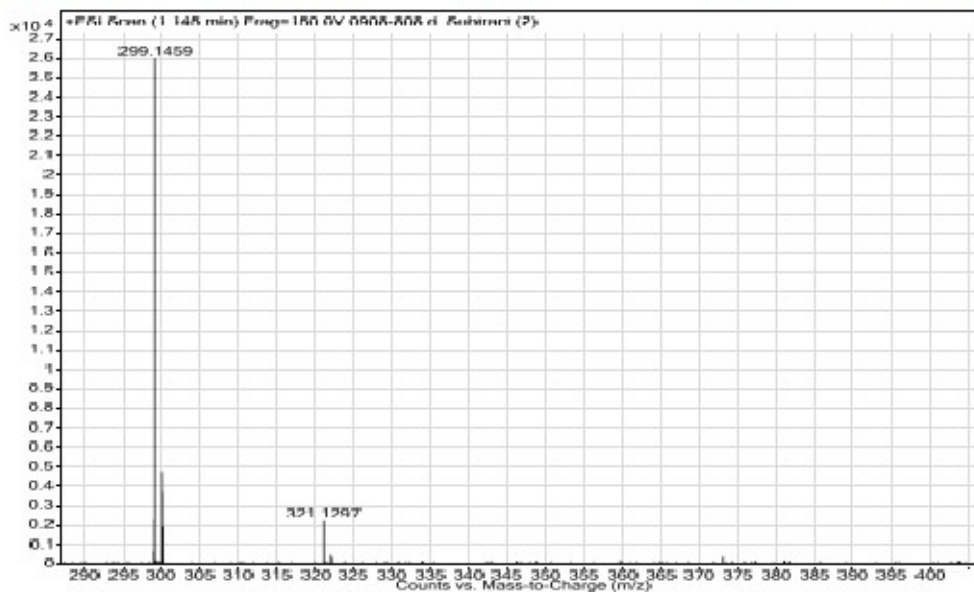

Fig. S12 HR-ESI-MS spectrum of NA3

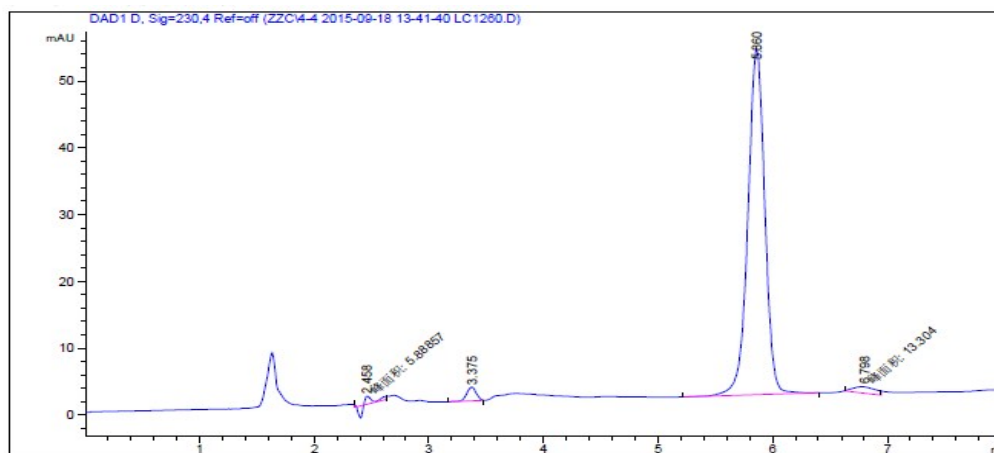

面积百分比报告

排序 : 信号  
 乘积因子 : 1.0000  
 稀释因子 : 1.0000  
 内标中不使用乘积因子和稀释因子

信号 1: DAD1 D, Sig=230,4 Ref=off

| 峰 # | 保留时间 [min] | 类型 | 峰宽 [min] | 峰面积 [mAU*s] | 峰高 [mAU]   | 峰面积 %   |
|-----|------------|----|----------|-------------|------------|---------|
| 1   | 2.458      | MM | 0.0834   | 5.88857     | 1.17649    | 1.0458  |
| 2   | 3.375      | BB | 0.1075   | 11.62448    | 2.00891    | 2.0646  |
| 3   | 5.860      | BB | 0.1692   | 532.23035   | 51.21563   | 94.5267 |
| 4   | 6.798      | MM | 0.2345   | 13.30401    | 9.45624e-1 | 2.3629  |

Fig. S13 HPLC spectrum of NA3



Reference:

1. H. Murad, K. Momoko, F. Shin-ichiro, K. Takashi, *Analyst*, 2001, 126, 104-108
2. Q. Li, P. Sritharathikhun, S. Motomizu, *Anal. Sci.*, 2007, 23, 413-417
3. T. Brewer, C. Chang, *J. Am. Chem. Soc.* 2015, 137, 10886–10889
4. A. Roth, H. Li, C. Anorma, J. Chan, *J. Am. Chem. Soc.* 2015, 137, 10890–10893
5. B. Dong, X. Song, Y. Tang, W. Lin, *Sensors and Actuators B*, 2016, 222, 325-330
6. L. He, X. Yang, Y. Liu, X. Kong, W. Lin, *Chem. Commun.*, 2016, **DOI:** 10.1039/C5CC09796G
